# Supplementary material for: An mRNA expression signature for prognostication in de novo acute myeloid leukemia patients with normal karyotype
Source: PubMed Central journal article supplement (PMC4770759; doi:10.18632/oncotarget.5390), 2015-10-23
Supplement: oncotarget-06-39098-s001.pdf [file oncotarget-06-39098-s001.pdf]

## SUPPLEMENTARY FIGURES AND TABLE

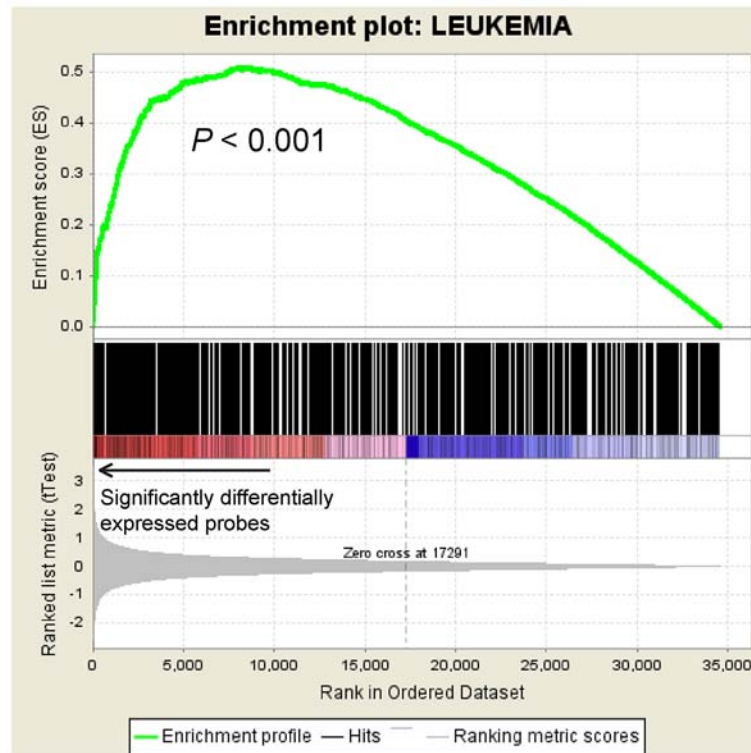

**Supplementary Figure S1: GSEA enrichment plots on genes associated with leukemia.** Genes related to this function were significantly differentially expressed between the PR and GR groups, suggesting significant correlations between this pathway and the treatment response.

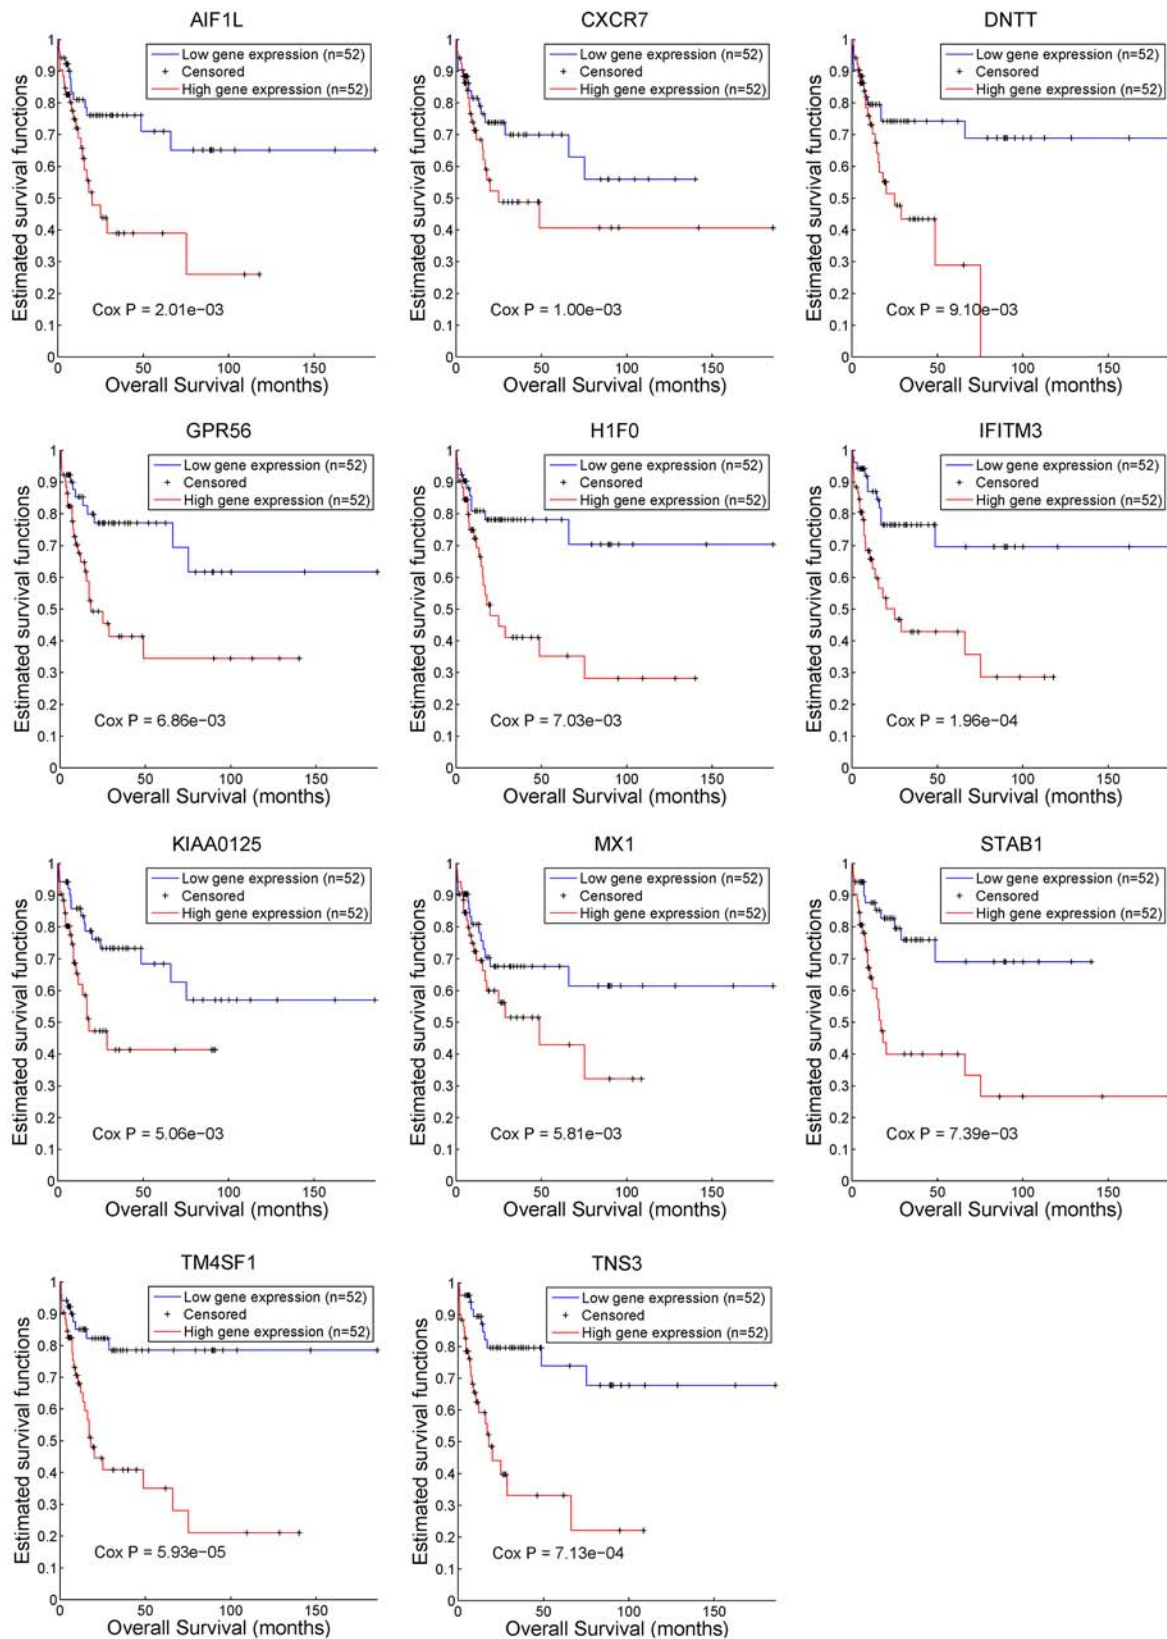

Supplementary Figure S2: The Kaplan Meier curves for OS stratified according to the expression levels of 11 genes which were significantly associated with OS among the 46 probes differentially expressed between the patients with good and poor response.

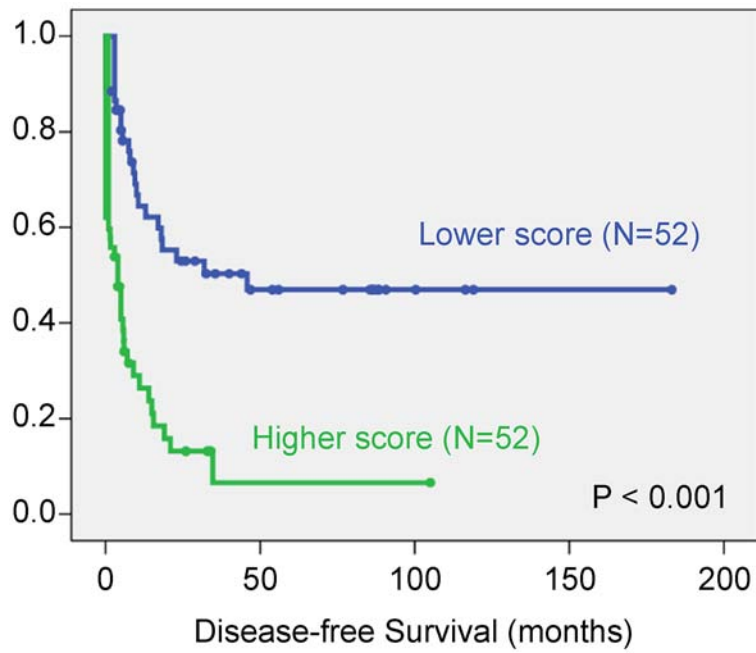

**Supplementary Figure S3: The Kaplan Meier curves for DFS according to the scores in NTUH cohort.** The patients with higher scores have significant shorter DFS than those with lower scores (median 4.0 vs. 45.8 months, log-rank  $P = 9.71 \times 10^{-7}$ )

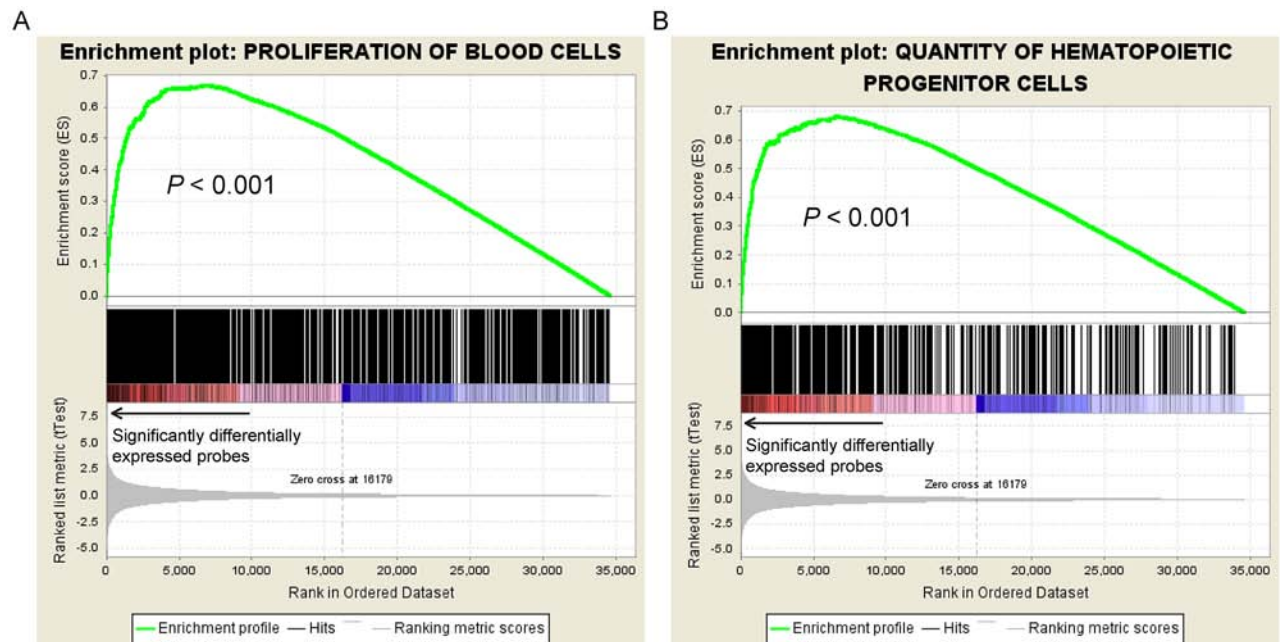

**Supplementary Figure S4: GSEA enrichment plots on genes associated with A. proliferation of blood cells and B. quantity of hematopoietic progenitor cells. Genes related to these two functions were significantly differentially expressed between the patients with higher and lower mRNA scores, suggesting significant correlations between these two pathways and the scoring.**

**Supplementary Table S1: Univariate analysis of the impact of clinical parameters and molecular alterations on overall survival in CN-AML patients**

| variable                         | Overall Survival |         |
|----------------------------------|------------------|---------|
|                                  | Median (months)  | P value |
| Age                              |                  | 0.005   |
| ≤50                              | NR               |         |
| >50                              | 28.7             |         |
| WBC                              |                  | 0.529   |
| ≤50 k/μL                         | 75.2             |         |
| >50 k/μL                         | NR               |         |
| <i>CEBPA</i>                     |                  | 0.010   |
| Double                           | NR               |         |
| Others                           | 66.1             |         |
| <i>NPM1</i>                      |                  | 0.334   |
| Mutated                          | NR               |         |
| Wild                             | 66.1             |         |
| <i>FLT3</i> -ITD                 |                  | 0.007   |
| Mutated                          | 15.5             |         |
| Wild                             | NR               |         |
| <i>NPM1</i> +/ <i>FLT3</i> -ITD- |                  | 0.582   |
| Compatible                       | NR               |         |
| Others                           | NR               |         |
| ELN Genetic Group                |                  | 0.001   |
| Favorable                        | NR               |         |
| Intermediate-1                   | 18.0             |         |
| <i>MLL</i> -PTD                  |                  | 0.023   |
| Mutated                          | 10.5             |         |
| Wild                             | 66.1             |         |
| <i>RUNX1</i>                     |                  | 0.012   |
| Mutated                          | 18.0             |         |
| Wild                             | NR               |         |
| <i>WT1</i>                       |                  | 0.237   |
| Mutated                          | 14.5             |         |
| Wild                             | NR               |         |
| <i>IDH1</i>                      |                  | 0.728   |
| Mutated                          | NR               |         |
| Wild                             | NR               |         |

(Continued)

| variable        | Overall Survival |         |
|-----------------|------------------|---------|
|                 | Median (months)  | P value |
| <i>IDH2</i>     |                  | 0.270   |
| Mutated         | 75.2             |         |
| Wild            | NR               |         |
| <i>FLT3-TKD</i> |                  | 0.345   |
| Mutated         | 25.0             |         |
| Wild            | NR               |         |
| <i>N-RAS</i>    |                  | 0.765   |
| Mutated         | 66.1             |         |
| Wild            | NR               |         |
| <i>ASXL1</i>    |                  | 0.583   |
| Mutated         | 16.0             |         |
| Wild            | NR               |         |
| <i>TET2</i>     |                  | 0.011   |
| Mutated         | 9.0              |         |
| Wild            | NR               |         |
| <i>DNMT3A</i>   |                  | 0.223   |
| Mutated         | 75.2             |         |
| Wild            | NR               |         |
| mRNA score      |                  | <0.001  |
| Lower           | NR               |         |
| Higher          | 17.0             |         |

Abbreviation: NR, not reached
